# Supplementary material for: The determination of two emerging perfluoroalkyl substances and related halogenated sulfonic acids and their significance for the drinking water supply chain
Source: Royal Society of Chemistry journal article supplement (doi:10.1039/c9em00393b), 2019-01-01
Supplement: c9em00393b1.pdf [file c9em00393b1.pdf]

## The determination of two emerging perfluoroalkyl substances and related halogenated sulfonic acids and their significance for the drinking water supply chain

D Vughs<sup>1</sup>, KA Baken<sup>1,1</sup>, MML Dingemans<sup>1</sup>, P de Voogt<sup>1,2,\*</sup>

<sup>1</sup>KWR Watercycle Research Institute, Groningehaven 7, 3430 BB Nieuwegein, The Netherlands

<sup>2</sup>IBED-FAME, University of Amsterdam, Science Park 904, Amsterdam, The Netherlands

\*Corresponding author, pim.de.voogt@kwrwater.nl

### Supplementary information

#### **Table of contents**

- Table SI-1. Technical names, structures, CAS numbers and full molecular names of emerging fluorinated compounds used in this study  
*Materials and Methods*
- Table SI-2. Sample description sampling campaign
- Analytical method for FOSA  
*Quality assurance*
- Table SI-3. Stability study results for F<sub>3</sub>-MSA and HFPO-DA in drinking and surface water after 21 days (N=7)
- Table SI-4. Validation results of F3-MSA in drinking- and surface water (n=8)
- Table S-5 Validation results of HFPO-Da in drinking- and surface water (n=8)  
*Results*
- Table SI-6. Results sampling campaign: concentrations of F3-MSA AND HFPO-DA
- Table SI-7 Halogenated MSAs selected for suspect screening
- Table SI-8 Results suspect screening of Cl-MSA, Cl<sub>2</sub>-MSA, Cl<sub>3</sub>-MSA, Br-MSA, Br<sub>2</sub>-MSA and BrCl-MSA
- Figure SI-1: concentrations of HFPO-DA detected in raw water and the corresponding drinking water from several locations.  
*Toxicological evaluation*
- Table SI-9 Structural alerts and Cramer classification indicated by OECD QSAR Toolbox (V3.4.0.17) profiling

---

<sup>1</sup> Current address: VITO N.V., Boeretang 200, 2400 Mol, Belgium

Table SI-1. Technical names, structures, CAS numbers and full molecular names of emerging fluorinated compounds used in this study

| Technical name      | Structure                                                                         | Mol weight | CAS        | Full names                                                                                                                          | Note                                            | Estimated Log D (ACD) | pKa                                         |
|---------------------|-----------------------------------------------------------------------------------|------------|------------|-------------------------------------------------------------------------------------------------------------------------------------|-------------------------------------------------|-----------------------|---------------------------------------------|
| HFPO-DA             | 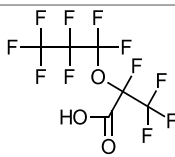 | 330        | 13252-13-6 | 2,3,3,3-tetrafluoro-2-(heptafluoropropoxy)propanoic acid / heptafluoropropoxypropanoic acid / perfluoro-2-(n-propoxy)propanoic acid | synonym: FRD-903; precursor of FRD-902; H-28307 | 1.34 <sup>a</sup>     | 2.84 <sup>c,e</sup>                         |
| FRD-902             |  | 347        | 62037-80-3 | ammonium 2,3,3,3-tetrafluoro-2-(heptafluoropropoxy)propanoate                                                                       | H-28308                                         | 2.58 <sup>b</sup>     | 3.87 <sup>d,e</sup><br>-0.77 <sup>f,e</sup> |
| F <sub>3</sub> -MSA |  | 150        | 1493-13-6  | trifluoromethanesulfonic acid; triflic acid                                                                                         |                                                 | -3.88 <sup>a</sup>    | -3.43 <sup>a</sup>                          |

<sup>a</sup> ChempSpider, estimated properties/ACD, log D at pH = 7.4

<sup>b</sup> ECHA dossier <https://echa.europa.eu/registration-dossier/-/registered-dossier/2679/4/8> accessed 20-05-2019

<sup>c</sup> Murrell BS, Nixon WB (2008) Determination of the dissociation constant and uv-vis absorption spectra of H-28307. Easton, Maryland, USA: Wildlife International, Ltd

<sup>d</sup> Nixon WB, Lezotte FJ (2008) Determination of the dissociation constant of H-28308. Easton, Maryland, USA: Wildlife International, Ltd

<sup>e</sup> According to the ECHA (dossier HFPO-DA: SVHC support document - HFPO-DA and its salts/acyl halides. ECHA, Helsinki 2019), the reliability of these two pKa values cannot be sufficiently assigned.

<sup>f</sup> With the QSAR program MarvinSketch v16.10.24, a pKa value of -0.77 is estimated for this compound (taken from ECHA dossier HFPO-DA: SVHC support document - HFPO-DA and its salts/acyl halides. ECHA, Helsinki 2019)

## Materials and methods

### Chemicals

All solvents used were of analytical grade quality. Methanol (ultra gradient HPLC grade) and Ammonium hydroxide were obtained from Avantor Performance Materials B.V. (Deventer, the Netherlands). Formic acid (HPLC quality) and hydrochloric acid 30% suprapur were purchased from Sigma-Aldrich (Steinheim, Germany) and Merck (Darmstadt, Germany), respectively. The internal standards HFPO-DA-<sup>13</sup>C<sub>3</sub> and PFBA-<sup>13</sup>C<sub>3</sub> were obtained from Greyhound Chromatography and Allied Chemicals (Birkenhead, United Kingdom). The reference standards HFPO-DA and trifluoromethanesulfonic acid (F<sub>3</sub>-MSA) were obtained from SynQuest Laboratories (Alachua, FL, USA) and Toronto Research Chemicals (Toronto, Canada), respectively. Ultrapure water was obtained by purifying demineralized water in an Elga Purelab Chorus ultrapure water system. (High Wycombe, United Kingdom). Stock solutions of reference and internal standards were prepared in methanol at a concentration of 100 and 5 mg/L, respectively. Stock solutions were stored at -25 °C.

For FOSA<sup>2</sup> the internal standard <sup>13</sup>C<sub>3</sub>-FOSA was obtained from Wellington laboratories (Ontario, Canada).

#### *Sample pre-treatment F<sub>3</sub>-MSA and HFPO-DA*

All materials used for sample storage and handling were from high quality plastics such as polypropylene, and no PTFE materials were used. Aliquots of 500 mL were acidified to pH 4 using hydrochloric acid, to which 50 ng/L of HFPO-DA-<sup>13</sup>C<sub>3</sub> internal standard was added. Then the samples were loaded onto a SPE cartridge (OASIS WAX, 150 mg, 6 cc) obtained from Waters (Etten-Leur, Netherlands) and subsequently washed with 5 mL ultrapure water (pH 4). The SPE cartridge was dried for 1 hour by air and elution was performed with 10 mL of methanol containing 0.25% ammonium hydroxide. The eluate was evaporated using a Barkey optocontrol (Leopoldshöhe, Germany) with a gentle nitrogen stream at circa 75 °C (block temperature at 300 °C) until a volume of 250 µL was reached. Then 750 µL ultrapure water was added to the extract, containing PFBA-<sup>13</sup>C<sub>3</sub> internal standard at a concentration of 16.67 µg/L. The extract was filtered using a 0.2 µm Phenomenex Phenex regenerated cellulose filter (Utrecht, Netherlands) and was transferred to a 1.8 mL autosampler vial for LC-Orbitrap-MS analysis.

#### *Sample pre-treatment for FOSA*

Aliquots of 200 ml of sample material were taken by weight and spiked with internal standard and, if necessary, with FOSA (e.g. validation and control samples) and centrifuged (2000 RPM) for at least 20 minutes. Samples were then loaded on a solid phase extraction (SPE) cartridge containing 60 mg Oasis WAX sorbent (Waters Chromatography B.V., Etten-Leur, the Netherlands). The cartridge was subsequently washed with 25 mM ammonium acetate buffer (pH 4) and eluted with 2x 550 µL methanol containing 0.1% ammonium hydroxide. Extracts were filtered (0.20 µm, polypropylene, Filter-Bio, Jiangsu, China), stored at -20 °C, and prior to analysis, diluted twice with an aqueous solution of 0.1% acetic acid.

#### *Liquid chromatography and mass spectrometry conditions F<sub>3</sub>-MSA*

Settings UHPLC, autosampler and column oven (Vanquish; Thermo Fisher Scientific, Bremen):

- Column: Obelisc N, 2.1 x 150 mm, 5 µm (SIELC Technologies, IL, USA)
- Mobile phase A: ultrapure water +10 mM ammonium acetate + 0.05% formic acid
- Mobile phase B: Methanol + 10 mM ammonium acetate + 0.05% formic acid
- Gradient: linear from 20% to 90% B in 7 min. Held at 90% B for 7 min. Then returned to initial conditions in 1min and held for 6 min.
- Flow: 300 µL/min
- Injection volume: 10 µL
- Column oven: 25 °C

Settings mass spectrometer (Orbitrap Fusion; Thermo Fisher Scientific, Bremen):

- Resolution MS1: 120 000 FWHM

---

<sup>2</sup> FOSA was included as a target analyte in the sample campaign. None of the water samples was found to contain FOSA at levels above the LOQ. The analytical methodology used for FOSA was based on a method developed by Eschauzier et al. Environ. Sci. Technol., 2012, 46, 1708-1715.

- Mass range full scan: 120-500 m/z
- Mass accuracy < 2 ppm
- Source: electrospray (ESI)
- Ionisation: negative mode
- Vaporizer: 350 °C
- Ion transfer tube: 300 °C
- Spray voltage: 2500 volt
- Sheat gas: 45 arbitrary units
- Auxiliary gas: 5 arbitrary units
- Sweep gas: 5 arbitrary units
- RF lens: 50%
- Resolution MS2: 15 000 FWHM
- Massrange MS2 scan: 50-160 m/z
- Precursor MS2: 148.95
- HCD: 50%
- Data dependent scans per cycle: 8
- Mass range data dependent MS2 scan: 120-500 m/z
- HCD data dependent scan: 35%

*Liquid chromatography and mass spectrometry conditions HFPO-DA*

Settings UHPLC , autosampler and column oven (Vanquish; Thermo Fisher Scientific, Bremen):

- Column: Xbridge BEH C18 XP 2.1 x 150 mm, 2.5 µm (Waters, Etten-Leur, Netherlands)
- Mobile phase A: ultrapure water +5 mM ammonium acetate
- Mobile phase B: Methanol + 5 mM ammonium acetate
- Gradient: linear from 25% to 100% B in 10 min. Held at 100% B for 4 min. Then returned to initial conditions in 0.5 min and held for 3.5min.
- Flow: 250 µL/min
- Injection volume: 50 µL
- Column oven: 25 °C

Settings mass spectrometer (Orbitrap Fusion; Thermo Fisher Scientific, Bremen):

- Resolution MS1: 120 000 FWHM
- Mass range full scan: 150-500 m/z
- Mass accuracy < 2 ppm
- Source: electrospray (ESI)
- Ionisation: negative mode
- Vaporizer: 250 °C
- Ion transfer tube: 200°C
- Spray voltage: 2500 volt
- Sheat gas: 50 arbitrary units
- Auxiliary gas: 10 arbitrary units
- Sweep gas: 5 arbitrary units
- RF lens: 30%
- Resolution MS2: 15 000 FWHM
- Massrange MS2 scan: 100-300 m/z

- Precursor MS2: 284.97
- HCD: 30%

#### *Liquid chromatography and mass spectrometry conditions FOSA*

Quantitative analysis was performed with liquid chromatography (Prominence XR, Shimadzu, Den Bosch, the Netherlands) coupled to a tandem mass spectrometer (4000 Q-TRAP, AB-Sciex (Applied Biosystems, Toronto, Canada)).

#### HPLC settings:

- Column: Kinetex C18 Evo column (100 mm x 2.1 mm ID; 2.6  $\mu$ m) with C18 Evo guard column (Phenomenex, Utrecht, the Netherlands)
- Eluent A: 2 mM ammonium acetate in ultrapure water
- Eluent B: 2 mM ammonium acetate in methanol
- Gradient: linear from 20% to 65% B in 2 min, then increased to 100% B in 7min. Held at 100% B for 1 min. Then returned to initial conditions in 1 min and was held for 5 min.
- Flow: 300  $\mu$ L/min
- Injection volume: 20  $\mu$ L (standards) or 50  $\mu$ L (samples)
- Retention time 3.4

#### Mass spectrometry settings:

- Source: Electrospray Ionisation (ESI)
- MS polarity: Negative
- MRM time window: 60 sec
- Total dwell time: 0.5 sec
- Transition\* (FOSA): 498 -> 78
- Transition\* ( $^{13}\text{C}_8$  FOSA): 498 -> 78

*\* A second transition was also detected for both analytes (498 -> 169 and 506 ->172), but found inadequate due to low sensitivity.*

Table SI-2. Sample description sampling campaign

| Sample description and origin         | Matrix         | Sampling date |
|---------------------------------------|----------------|---------------|
| Keizersveer                           | Surface water  | 12-09-2017    |
| Biesboschbekkens                      | Surface water  | 12-09-2017    |
| Purified water Kralingen              | Drinking water | 11-09-2017    |
| Raw groundwater Jeugddorp (Dordrecht) | Groundwater    | 11-09-2017    |
| Purified groundwater Baanhoek         | Drinking water | 11-09-2017    |
| Purified water Baanhoek               | Drinking water | 11-09-2017    |
| Heel, Intake Lateraalkanaal           | Surface water  | 12-09-2017    |

| Sample description and origin                              | Matrix              | Sampling date |
|------------------------------------------------------------|---------------------|---------------|
| Heel, Reservoir De lange Vlieter                           | Surface water       | 13-09-2017    |
| Heel, raw water Galgenberg                                 | River bank filtrate | 12-09-2017    |
| Heel, raw water De Reut en Langven                         | River bank filtrate | 12-09-2017    |
| Heel, purified water Helden                                | Drinking water      | 12-09-2017    |
| Vessem raw water                                           | Groundwater         | 12-09-2017    |
| Vessem purified water                                      | Drinking water      | 12-09-2017    |
| Waalwijk raw water                                         | Groundwater         | 12-09-2017    |
| Waalwijk purified water (Vlijmen)                          | Drinking water      | 12-09-2017    |
| Intake Brakel                                              | Surface water       | 11-09-2017    |
| Dune filtrate Meijendell                                   | Dune filtrate       | 12-09-2017    |
| Dune filtrate Berkheide                                    | Dune filtrate       | 12-09-2017    |
| Tap water Scheveningen                                     | Drinking water      | 12-09-2017    |
| Lake Ijsselmeer water                                      | Surface water       | 11-09-2017    |
| Effluent WPJ                                               | Surface water       | 12-09-2017    |
| Influent UV/H <sub>2</sub> O <sub>2</sub> -AKF             | Surface water       | 12-09-2017    |
| Influent dune (effluent UV/H <sub>2</sub> O <sub>2</sub> ) | Surface water       | 12-09-2017    |
| Effluent dunes                                             | Dune filtrate       | 11-09-2017    |
| Tap water Bergen                                           | Drinking water      | 11-09-2017    |
| Grondwater Laren                                           | Groundwater         | 11-09-2017    |
| Raw water intake WCB (Lekkanaal)                           | Surface water       | 11-09-2017    |
| Raw water Bethunepolder                                    | Surface water       | 12-09-2017    |
| Raw water (dune filtrate)                                  | Surface water       | 11-09-2017    |
| Purified water Leiduin                                     | Drinking water      | 11-09-2017    |
| Purified water Weesperkarspel                              | Drinking water      | 11-09-2017    |
| Vechterweerd raw water                                     | River bank filtrate | 14-09-2017    |
| Vechterweerd purified water                                | Drinking water      | 14-09-2017    |
| Engelse Werk purified water                                | Drinking water      | 13-09-2017    |
| Buren purified                                             | Drinking water      | 12-09-2017    |
| Doorn purified                                             | Drinking water      | 13-09-2017    |
| Soestduinen purified                                       | Drinking water      | 14-09-2017    |
| Edese Bos purified                                         | Drinking water      | 14-09-2017    |
| Dinxperlo purified                                         | Drinking water      | 13-09-2017    |
| Lekkerkerk-Tiendweg raw water                              | River bank filtrate | 14-09-2017    |
| Lekkerkerk-Tiendweg purified water                         | Drinking water      | 14-09-2017    |
| RO Feed                                                    | River bank filtrate | 14-09-2017    |
| RO Permeate                                                | River bank filtrate | 14-09-2017    |
| RO Concentrate                                             | River bank filtrate | 15-09-2017    |
| Drentse Aa                                                 | Surface water       | 11-09-2017    |
| WMD Purified water                                         | Drinking water      | 11-09-2017    |
| Noordbargeres raw water                                    | Groundwater         | 11-09-2017    |
| Noordbargeres purified water                               | Drinking water      | 11-09-2017    |
| Blankaart raw water                                        | Surface water       | 13-09-2017    |
| Blankaart purified water                                   | Drinking water      | 13-09-2017    |
| WPC Zele raw water                                         | Surface water       | 12-09-2017    |
| WPC Zele purified water                                    | Drinking water      | 12-09-2017    |

| Sample description and origin | Matrix        | Sampling date |
|-------------------------------|---------------|---------------|
| Lobith (river Rhine)          | Surface water | 14-09-2017    |

## Quality assurance

### *Absolute recovery*

The absolute recovery was determined for F<sub>3</sub>-MSA (50 ng/L; n=2) and HFPO-DA (20 ng/L; n=2), in spiked surface water, yielding a recovery of 93.5% and 89.16% respectively. No major loss of analytes was observed, showing that the sample pre-treatment method developed is satisfactory. Subsequently the matrix effects in surface water were determined. No matrix effects were observed for HFPO-DA, but moderate ion suppression (circa 25%) was observed for F<sub>3</sub>-MSA in surface water. Because no isotope labeled internal standard is available for F<sub>3</sub>-MSA, for which now the surrogate standard PFBA-<sup>13</sup>C<sub>3</sub> is used, it is currently not possible to correct the results obtained for the observed ion suppression.

### *Sample storage stability*

Perfluorinated compounds are known to be persistent, therefore it is unlikely that degradation would occur during the storage time study. However, it is also known that PFAS can adsorb to surfaces including sample bottle walls. In order to determine if adsorption really is an issue for F<sub>3</sub>-MSA and HFPO-DA, a stability study was performed for drinking- and surface water in polypropylene sample bottles. After spiking the samples with 200 ng/L of HFPO-DA and 1 µg/L of F<sub>3</sub>-MSA, the samples were stored at 1-5°C for 21 d. A number of blank samples were also prepared, in order to demonstrate that the sample bottles do not contain any PFAS. After 21 d new drinking- and surface water samples were prepared containing 200 ng/L of HFPO-DA and 1 µg/L of F<sub>3</sub>-MSA. The stability was determined by analysing the “0 day” and “21 day” samples. The results of the stability study are shown in table S-3.

Table SI-3. Stability study results for F<sub>3</sub>-MSA and HFPO-DA in drinking and surface water after 21 days (N=7)

|                     | Drinking water |     |         |     |            | Surface water |     |         |     |            |
|---------------------|----------------|-----|---------|-----|------------|---------------|-----|---------|-----|------------|
|                     | 0 days         |     | 21 days |     | difference | 0 days        |     | 21 days |     | difference |
|                     | conc           | RSD | conc    | RSD |            | conc          | RSD | conc    | RSD |            |
|                     | (µg/L)         | (%) | (µg/L)  | (%) | (%)        | (µg/L)        | (%) | (µg/L)  | (%) | (%)        |
| F <sub>3</sub> -MSA | 1.12           | 3.5 | 1.16    | 2.0 | 3.2        | 0.967         | 4.1 | 0.978   | 4.3 | 1.2        |
| HFPO-DA             | 0.189          | 3.6 | 0.190   | 2.7 | 0.7        | 0.187         | 2.6 | 0.190   | 2.1 | 1.1        |

No degradation or adsorption was observed for F<sub>3</sub>-MSA and HFPO-DA, neither in drinking water nor in surface water after 21 d. It can be concluded that the samples can be safely stored for 21 d at 1-5°C prior to sample analysis. Furthermore, no PFAS were detected in the blank samples, showing that the polypropylene sample bottles are applicable for the sampling campaign.

#### Method validation

The two methods developed for F<sub>3</sub>-MSA and HFPO-DA were validated for drinking and surface water. First the instrumental repeatability was determined using a reference standard of 20 ng/L of HPFO-DA and 50 ng/L F<sub>3</sub>-MSA, for which an instrumental repeatability (n=8) was found of 0.4% and 2.0%, respectively. The limit of detection (LOD), limit of quantification (LOQ), repeatability (RSD) and SPE recovery were determined in drinking and surface water. The validation results are shown in tables S-4 and S-5 for F<sub>3</sub>-MSA and HFPO-DA, respectively.

Table SI-4. Validation results of F<sub>3</sub>-MSA in drinking- and surface water (n=8)

| Matrix         | LOD<br>ng/L | LOQ<br>ng/L | Repeatability (%) |         | SPE recovery<br>(10 ng/L)<br>(%) |
|----------------|-------------|-------------|-------------------|---------|----------------------------------|
|                |             |             | 1 ng/L            | 50 ng/L |                                  |
| Drinking water | 0.242       | 1.0         | 6.0               | 7.1     | 118.4                            |
| Surface water  | *           | 1.0         | 4.8**             | 6.9     | 75.8                             |

\* = Because there was no surface water available in which low concentration of F<sub>3</sub>-MSA (< 2 ng/L) were present, it was not possible to determine the LOD in surface water. The LOD of drinking water is therefore used as reference

\*\* = Determined at 10 ng/L.

Table SI-5. Validation results of HFPO-Da in drinking- and surface water (n=8)

| Matrix         | LOD<br>ng/L | LOQ<br>ng/L | Repeatability (%) |         | SPE Recovery<br>(0.2 ng/L)<br>(%) |
|----------------|-------------|-------------|-------------------|---------|-----------------------------------|
|                |             |             | 0.2 ng/L          | 20 ng/L |                                   |
| Drinking water | 0.011       | 0.20        | 1.8               | 1.9     | 102.6                             |
| Surface water  | 0.049       | 0.20        | 6.5               | 1.0     | 99.2                              |

Satisfactory LOD and LOQ results were obtained for F<sub>3</sub>-MSA and HFPO-DA in drinking- and surface water. In surface water, for F<sub>3</sub>-MSA it was not possible to determine a proper LOD, due to the presence of low concentrations of this compound in every surface water sample that was tested. Therefore the LOD of drinking water was used as a reference and to calculate a LOQ. A practical quantification limit was used, which was calculated by multiplying the LOD by 3.3x and rounding the results upwards, in order to obtain the same LOQ for drinking and surface water. The LOQ was determined at 1.0 and 0.2 ng/L for F<sub>3</sub>-MSA



and HFPO-DA, respectively. Recoveries in drinking- and surface water are between 75 and 120%. The obtained recovery of 75.8% for F<sub>3</sub>-MSA is not due to the loss of analyte, rather a result of matrix effects. The repeatability for both compounds is ≤7.1%.

Table SI-6. Results sampling campaign: concentrations of F<sub>3</sub>-MSA AND HFPO-DA

| Sample description                            | Matrix              | Concentration               |                 |
|-----------------------------------------------|---------------------|-----------------------------|-----------------|
|                                               |                     | F <sub>3</sub> -MSA<br>ng/L | HFPO-DA<br>ng/L |
| <b>Evides</b>                                 |                     |                             |                 |
| Keizersveer                                   | Surface water       | 28                          | 5.8             |
| Afgeleverd water Biesboschbekkens             | Surface water       | 24                          | 10              |
| Reinwater Kralingen                           | Drinking water      | 21                          | 8.9             |
| Ruw grondwater Jeugddorp (Dordrecht)          | Groundwater         | < 1.0                       | < 0.20          |
| Reinwater grondwaterzuivering Baanhoek        | Drinking water      | 22                          | 10              |
| Reinwater Baanhoek (dw uit ow en gw)          | Drinking water      | 22                          | 9.8             |
| <b>WML</b>                                    |                     |                             |                 |
| Heel, Innamewerk Lateraalkanaal               | Surface water       | 32                          | 0.60            |
| Heel, Spaarbekken De lange Vlieter            | Surface water       | 150                         | 0.84            |
| Heel, Gezamenlijk ruwwater Galgenberg         | River bank filtrate | 135                         | 0.40            |
| Heel, Gezamenlijk ruwwater De Reut en Langven | River bank filtrate | 230                         | 0.22            |
| Heel, Reinwaterlevering Helden                | Drinking water      | 165                         | 0.34            |
| <b>Brabant Water</b>                          |                     |                             |                 |
| Vessem ruwwater                               | Groundwater         | < 1.0                       | < 0.20          |
| Vessem reinwater                              | Drinking water      | < 1.0                       | < 0.20          |
| Waalwijk ruwwater                             | Groundwater         | < 1.0                       | < 0.20          |
| Waalwijk reinwater (vlijmen)                  | Drinking water      | < 1.0                       | < 0.20          |
| <b>Dunea</b>                                  |                     |                             |                 |
| Inname Lagedruk pompstation Brakel            | Surface water       | 29                          | 9.7             |
| Duinfiltraat Meijendell                       | Dune filtrate       | 24                          | 6.7             |
| Duinfiltraat Berkheide                        | Dune filtrate       | 45                          | 5.0             |
| reinwater Scheveningen                        | Drinking water      | 43                          | 4.6             |
| <b>PWN</b>                                    |                     |                             |                 |
| IJsselmeerwater                               | Surface water       | 49                          | 0.28            |
| Effluent WPJ                                  | Surface water       | 46                          | 0.30            |
| Toevoer UV/H2O2-AKF                           | Surface water       | 39                          | 0.22            |
| Toevoer duin (na passage UV/H2O2)             | Surface water       | 39                          | 0.22            |
| Na duinpassage                                | Dune filtrate       | 45                          | 0.22            |
| Drinkwater Bergen                             | Drinking water      | 27                          | 0.20            |
| Grondwater secundair Zuid in Laren            | Groundwater         | < 1.0                       | < 0.20          |
| <b>Waternet</b>                               |                     |                             |                 |
| Ruw water inlaat WCB (Lekkanaal)              | Surface water       | 35                          | < 0.20          |
| Bethunepolder                                 | Surface water       | 8.5                         | 0.53            |
| Ruwwater (duinfiltraat)                       | Surface water       | 52                          | 0.20            |
| Reinwater Leiduin                             | Drinking water      | 50                          | 0.28            |
| Reinwater Weesperkarspel                      | Drinking water      | 10                          | 0.28            |
| <b>Vitens</b>                                 |                     |                             |                 |
| Vechterweerd ruw                              | River bank filtrate | 7.4                         | < 0.20          |
| Vechterweerd rein                             | Drinking water      | 4.9                         | < 0.20          |
| Pb. Engelse Werk rein                         | Drinking water      | 21                          | < 0.20          |
| Pb. Buren rein                                | Drinking water      | < 1.0                       | < 0.20          |
| Pb. Doorn rein                                | Drinking water      | < 1.0                       | < 0.20          |
| Pb. Soestduinen rein                          | Drinking water      | < 1.0                       | < 0.20          |
| Pb. Edese Bos rein                            | Drinking water      | < 1.0                       | < 0.20          |
| Pb. Dinxperlo rein                            | Drinking water      | 20                          | < 0.20          |
| <b>Oasen</b>                                  |                     |                             |                 |
| Lekkerkerk-Tiendweg ruw                       | River bank filtrate | 62                          | 59              |



| Sample description                            | Matrix | n  | Cl-MSA<br>(ng/L)* | Cl <sub>2</sub> -MSA<br>(ng/L)* | Cl <sub>3</sub> -MSA<br>(ng/L)* | Br-MSA<br>(ng/L)* | Br <sub>2</sub> -MSA<br>(ng/L)* | BrCl-MSA<br>(ng/L)* |
|-----------------------------------------------|--------|----|-------------------|---------------------------------|---------------------------------|-------------------|---------------------------------|---------------------|
| Noordbargeres rein                            | DW     | 20 | n.d.              | n.d.                            | n.d.                            | n.d.              | n.d.                            | n.d.                |
| WPC Blankaart reinwater                       | DW     | 21 | n.d.              | 75                              | 4.0                             | n.d.              | 65                              | 108                 |
| WPC Zele reinwater                            | DW     | 22 | n.d.              | 148                             | n.d.                            | n.d.              | 3.7                             | 52                  |
| ruw grondwater Jeugddorp (Dordrecht)          | GW     | 1  | n.d.              | n.d.                            | n.d.                            | n.d.              | n.d.                            | n.d.                |
| Vessem ruwwater                               | GW     | 2  | n.d.              | n.d.                            | n.d.                            | n.d.              | n.d.                            | n.d.                |
| Waalwijk ruwwater                             | GW     | 3  | n.d.              | n.d.                            | n.d.                            | n.d.              | n.d.                            | n.d.                |
| Grondwater secundair Zuid in Laren            | GW     | 4  | n.d.              | n.d.                            | n.d.                            | n.d.              | n.d.                            | n.d.                |
| Noordbargeres ruw                             | GW     | 5  | n.d.              | n.d.                            | n.d.                            | n.d.              | n.d.                            | n.d.                |
| Keizersveer                                   | SW     | 1  | n.d.              | 12                              | 3.1                             | n.d.              | 1.2                             | n.d.                |
| Afgeleverd water Biesboschbekkens             | SW     | 2  | n.d.              | 33                              | 1.8                             | 1.1               | 11                              | 17                  |
| Heel, Innamewerk Lateraalkanaal               | SW     | 3  | n.d.              | 10                              | 1.6                             | n.d.              | n.d.                            | n.d.                |
| Heel, Spaarbekken De lange Vlieter            | SW     | 4  | n.d.              | 3.4                             | n.d.                            | n.d.              | n.d.                            | n.d.                |
| Inname Lagedruk pompstation Brakel            | SW     | 5  | n.d.              | 7.5                             | 2.2                             | n.d.              | 2.1                             | n.d.                |
| IJsselmeerwater                               | SW     | 6  | n.d.              | 1.4                             | n.d.                            | n.d.              | 1.3                             | n.d.                |
| Ruw water inlaat WCB (Lekkanaal)              | SW     | 7  | n.d.              | 3.3                             | 1.2                             | n.d.              | n.d.                            | n.d.                |
| Bethunepolder                                 | SW     | 8  | n.d.              | 0.9                             | n.d.                            | n.d.              | n.d.                            | n.d.                |
| ruwwater (duinfiltraat)                       | SW     | 9  | n.d.              | n.d.                            | n.d.                            | n.d.              | n.d.                            | n.d.                |
| Drentse Aa                                    | SW     | 10 | n.d.              | 1.7                             | n.d.                            | n.d.              | n.d.                            | n.d.                |
| WPC Blankaart ruwwater                        | SW     | 11 | n.d.              | 32                              | 3.7                             | n.d.              | 10                              | 19                  |
| WPC Zele ruwwater                             | SW     | 12 | n.d.              | n.d.                            | n.d.                            | n.d.              | n.d.                            | n.d.                |
| Lobith                                        | SW     | 13 | n.d.              | 3.8                             | 1.0                             | n.d.              | n.d.                            | n.d.                |
| Heel, gezamenlijk ruwwater Galgenberg         | RBF/DF | 1  | n.d.              | n.d.                            | n.d.                            | n.d.              | n.d.                            | n.d.                |
| Heel, gezamenlijk ruwwater De Reut en Langven | RBF/DF | 2  | n.d.              | n.d.                            | n.d.                            | n.d.              | n.d.                            | n.d.                |
| Vechterweerd ruw                              | RBF/DF | 3  | n.d.              | n.d.                            | n.d.                            | n.d.              | n.d.                            | n.d.                |
| Lekkerkerk-Tiendweg ruw                       | RBF/DF | 4  | n.d.              | n.d.                            | n.d.                            | n.d.              | n.d.                            | n.d.                |
| Duinfiltraat Meijendell                       | RBF/DF | 5  | n.d.              | n.d.                            | n.d.                            | n.d.              | n.d.                            | n.d.                |
| Duinfiltraat Berkheide                        | RBF/DF | 6  | n.d.              | n.d.                            | n.d.                            | n.d.              | n.d.                            | n.d.                |
| Na duinpassage                                | RBF/DF | 7  | n.d.              | n.d.                            | n.d.                            | n.d.              | n.d.                            | n.d.                |
| RO Feed                                       | PW     | 1  | n.d.              | n.d.                            | n.d.                            | n.d.              | n.d.                            | n.d.                |
| RO Permeaat                                   | PW     | 2  | n.d.              | n.d.                            | n.d.                            | n.d.              | n.d.                            | n.d.                |
| RO Concentraat                                | PW     | 3  | n.d.              | n.d.                            | n.d.                            | n.d.              | n.d.                            | n.d.                |
| Effluent WPJ                                  | PW     | 4  | n.d.              | n.d.                            | n.d.                            | n.d.              | n.d.                            | n.d.                |
| Toevoer UV/H2O2-AKF                           | PW     | 5  | n.d.              | 1.9                             | n.d.                            | n.d.              | n.d.                            | n.d.                |
| Toevoer duin (na passage UV/H2O2)             | PW     | 6  | n.d.              | 1.2                             | n.d.                            | n.d.              | 1.1                             | n.d.                |

\* = F<sub>3</sub>-MSA equivalents

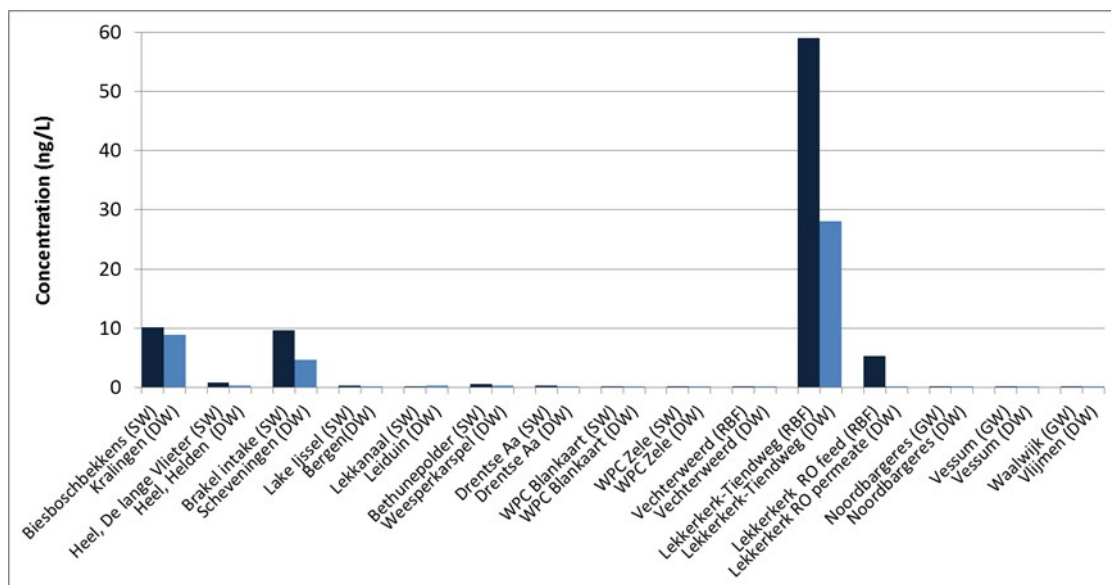

Figure SI-1: Concentrations of HFPO-DA detected in raw water and the corresponding drinking water from several locations. Side-to-side bars reflect corresponding water works (i.e. water from same source before and after treatment). Raw water is dark blue, drinking water light blue. SW, surface water; DW, drinking water; RBF, river bank filtrate; GW, groundwater; RO, reverse osmosis

## Toxicological evaluation

### HFPO-DA

A provisional oral Tolerable Daily Intake (TDI) level for FRD-902 was derived by RIVM<sup>1</sup> from the No Observed Adverse Effect Level (NOAEL) observed in a chronic rat study (submitted by REACH registration applicant): 0.1 mg/kg body weight/day based on an increase in albumin and the albumin/globulin ratio (which indicates possible immunotoxic effects) at higher doses. Using an extrapolation factor for interspecies differences in kinetics (standard value of 4), an additional factor for potential differences in kinetics (a worst-case value of 66 due to lack of data), a factor for differences between species (1.8) and a factor for differences between humans (standard value of 10), a TDI of 21 ng/kg/day was calculated. Additional information on the bioaccumulation of FRD-902 in humans would allow derivation of an improved exposure limit<sup>2</sup>. In addition, potential carcinogenic effects have not been incorporated in this TDI level.

The provisional TDI of 21 ng/kg bw/day was converted to a drinking water guideline value by assuming the WHO default of 20% allocation of the total exposure to drinking-water, an adult body weight of 70 kg and a standard drinking-water consumption of 2L per day. This resulted in a provisional drinking water guideline value for FRD-902 of 0.15 µg/L. This value also applies to HFPO-DA and the anion, and to the sum of the three substances.

During the fluoropolymer production process, HFPO-DA, and possibly some FRD-902, is released to air and HFPO-DA and FRD-902 are emitted to wastewater. The estimated concentration of HFPO-DA in air is 20 ng/m<sup>3</sup> for the nearest populated areas of the fluoropolymer manufacturing site in The Netherlands<sup>2</sup>. At a default adult inhalation volume of 20 m<sup>3</sup>/day, the inhalatory exposure to HFPO-DA would amount to 400 ng/day (5.7 ng/kg bw/day) in this region.

Concentrations of HFPO-DA up to 0.02 µg/L have been reported in drinking water produced from surface water downstream from the plant. Since both substances will be present in water in the anion form, this concentration reflects the emission of both HFPO-DA and FRD-902 to surface water. The summed exposure through drinking water will thus be 40 ng/day (0.6 ng/kg bw/day). No information is currently available regarding levels of HFPO-DA and FRD-902 in food<sup>2</sup>. Exposure of consumers to HFPO-DA via food contact materials, for which quantitative information has not been identified, is expected to be negligible<sup>3</sup>. However, since these substances are persistent, it is likely that they also end up in the food chain. The allocation factor of 20% applied to derive the provisional drinking water guideline value thus seems appropriate.

### *F<sub>3</sub>-MSA*

No toxicity studies and health risk assessments for F<sub>3</sub>-MSA were retrieved from the consulted authorities and databases. Three negative study results for genotoxicity (Ames mutagenicity test, *in vitro* chromosome aberration, and mammalian gene mutation assay) and no structural alerts for genotoxicity are reported in the OECD QSAR Toolbox. F<sub>3</sub>-MSA was inactive in >50 ToxCast *in vitro* assays on various cellular processes<sup>4</sup> and 145 *in vitro* bioassays tests reported by the U.S. EPA Chemistry Dashboard. Literature search did not yield additional toxicological information on F<sub>3</sub>-MSA. The derived pGLV is based on a short term repeated dose oral exposure study in rats (OECD TG-407) that is reported in the REACH registration dossier for F<sub>3</sub>-MSA (NOAEL: 1000 mg/kg bw)<sup>5</sup>. Effects observed at lower doses in the study described in the REACH dossier for F<sub>3</sub>-MSA (see Toxicological information, Repeated dose toxicity) are local effects in the rat forestomach, in which food is stored for hours before emptying into the stomach for further digestion. These effects are not transposable to humans as there is no forestomach in human physiology. Exposure information on F<sub>3</sub>-MSA was not found in the consulted information sources and literature. Although the substance has been predicted not to be a PBT chemical<sup>6,7</sup>, its widespread detection in the aquatic environment<sup>8</sup> suggests human exposure through other routes than drinking water as well.

Table SI-9 Structural alerts and Cramer classification indicated by OECD QSAR Toolbox (V3.4.0.17) profiling

| Technical name      | CAS        | Structural alerts                                                                                                                                                                                                                                                                                                                                                                                                                                                                                                                                                                                                                                                                                                                                                                                                                                       | Cramer class     |
|---------------------|------------|---------------------------------------------------------------------------------------------------------------------------------------------------------------------------------------------------------------------------------------------------------------------------------------------------------------------------------------------------------------------------------------------------------------------------------------------------------------------------------------------------------------------------------------------------------------------------------------------------------------------------------------------------------------------------------------------------------------------------------------------------------------------------------------------------------------------------------------------------------|------------------|
| HPFO-DA             | 13252-13-6 | <p><u>DNA Binding by OASIS v.1.4:</u></p> <p>AN2 &gt;&gt; Schiff base formation by aldehyde formed after metabolic activation &gt;&gt; Geminal Polyhaloalkane Derivatives</p> <p>Radical &gt;&gt; Radical mechanism via ROS formation (indirect) &gt;&gt; Geminal Polyhaloalkane Derivatives</p> <p>SN1 &gt;&gt; Carbenium ion formation &gt;&gt; Alpha-Haloethers</p> <p>SN2 &gt;&gt; Acylation involving a leaving group after metabolic activation &gt;&gt; Geminal Polyhaloalkane Derivatives</p> <p>SN2 &gt;&gt; Nucleophilic substitution at sp<sup>3</sup> carbon atom after thiol (glutathione) conjugation &gt;&gt; Geminal Polyhaloalkane Derivatives</p> <p>SN2 &gt;&gt; SN2 at sp<sup>3</sup>-carbon atom &gt;&gt; Alpha-Haloethers</p> <p><u>In vivo mutagenicity (Micronucleus) alerts by ISS:</u></p> <p>H-acceptor-path3-H-acceptor</p> | High (Class III) |
| FRD-902             | 62037-80-3 | <p><u>DNA Binding by OASIS v.1.4:</u></p> <p>AN2 &gt;&gt; Schiff base formation by aldehyde formed after metabolic activation &gt;&gt; Geminal Polyhaloalkane Derivatives</p> <p>Radical &gt;&gt; Radical mechanism via ROS formation (indirect) &gt;&gt; Geminal Polyhaloalkane Derivatives</p> <p>SN1 &gt;&gt; Carbenium ion formation &gt;&gt; Alpha-Haloethers</p> <p>SN2 &gt;&gt; Acylation involving a leaving group after metabolic activation &gt;&gt; Geminal Polyhaloalkane Derivatives</p> <p>SN2 &gt;&gt; Nucleophilic substitution at sp<sup>3</sup> carbon atom after thiol (glutathione) conjugation &gt;&gt; Geminal Polyhaloalkane Derivatives</p> <p>SN2 &gt;&gt; SN2 at sp<sup>3</sup>-carbon atom &gt;&gt; Alpha-Haloethers</p> <p><u>In vivo mutagenicity (Micronucleus) alerts by ISS:</u></p> <p>H-acceptor-path3-H-acceptor</p> | High (Class III) |
| F <sub>3</sub> -MSA | 1493-13-6  | No structural alerts                                                                                                                                                                                                                                                                                                                                                                                                                                                                                                                                                                                                                                                                                                                                                                                                                                    | High (Class III) |

## References

<sup>1</sup> Janssen P (2016) Derivation of a lifetime drinking-water guideline value for 2,3,3,3-tetrafluoro-2-(heptafluoropropoxy)propanoic acid (FRD-902). Advice of 17 November 2016 to Ministry of Infrastructure and Environment. Project M/300007/16/PF. Bilthoven, RIVM.

<sup>2</sup> Beekman M, Zweers P, Muller A, de Vries W, Janssen P, Zeilmaker M (2016) Evaluation of substances used in the GenX technology by Chemours, Dordrecht. RIVM Report 2016-0174, Bilthoven.

---

<sup>3</sup> EFSA (2009) Scientific Opinion of the Panel on food contact materials, enzymes, flavourings and processing aids (CEF) on 24th list of substances for food contact materials. The EFSA Journal, 2009: p. 1157-116

<sup>4</sup> *ToxCast database* 2017; Available from: <https://actor.epa.gov/dashboard/>

<sup>5</sup> ECHA (2017) *Trifluoromethanesulphonic acid Registration Dossier*. Available from: <https://echa.europa.eu/registration-dossier/-/registered-dossier/5311/1>.

<sup>6</sup> *Categorization Results from the Canadian Domestic Substance List*. 2017; Available from: <http://webnet.oecd.org/ccrweb/ChemicalDetails.aspx?ChemicalID=4F8DF918-8830-4839-8A04-96CF211AEBDF>.

<sup>7</sup> Rayne S, Forest K (2016) Estimated pKa values for the environmentally relevant C1 through C8 perfluorinated sulfonic acid isomers. *J. Environ, Sci. Health, Part A*, 51, 1018-1023. <https://doi.org/10.1080/10934529.2016.1198191>

<sup>8</sup> D Zahn, T Froemel, TP Knepper (2016) Halogenated methanesulfonic acids: A new class of organic micropollutants in the water cycle, *Water Res.* 101, 292-299.
